# Supplementary material
Source: publisher site journal article supplement (https://www.spandidos-publications.com/2851/downloadSupplementary)

Figure S1. Expression levels of SFMBT1 and ZHX2 according to the database. The expression levels of (A) SFMBT1 and (B) ZHX2 in different kidney cancer subgroups. Red represents tumor samples, while gray represents normal samples. SFMBT1, scm-like with four malignant brain tumor domains; ZHX2, zinc fingers and homeoboxes 2; T, tumor; N, normal.

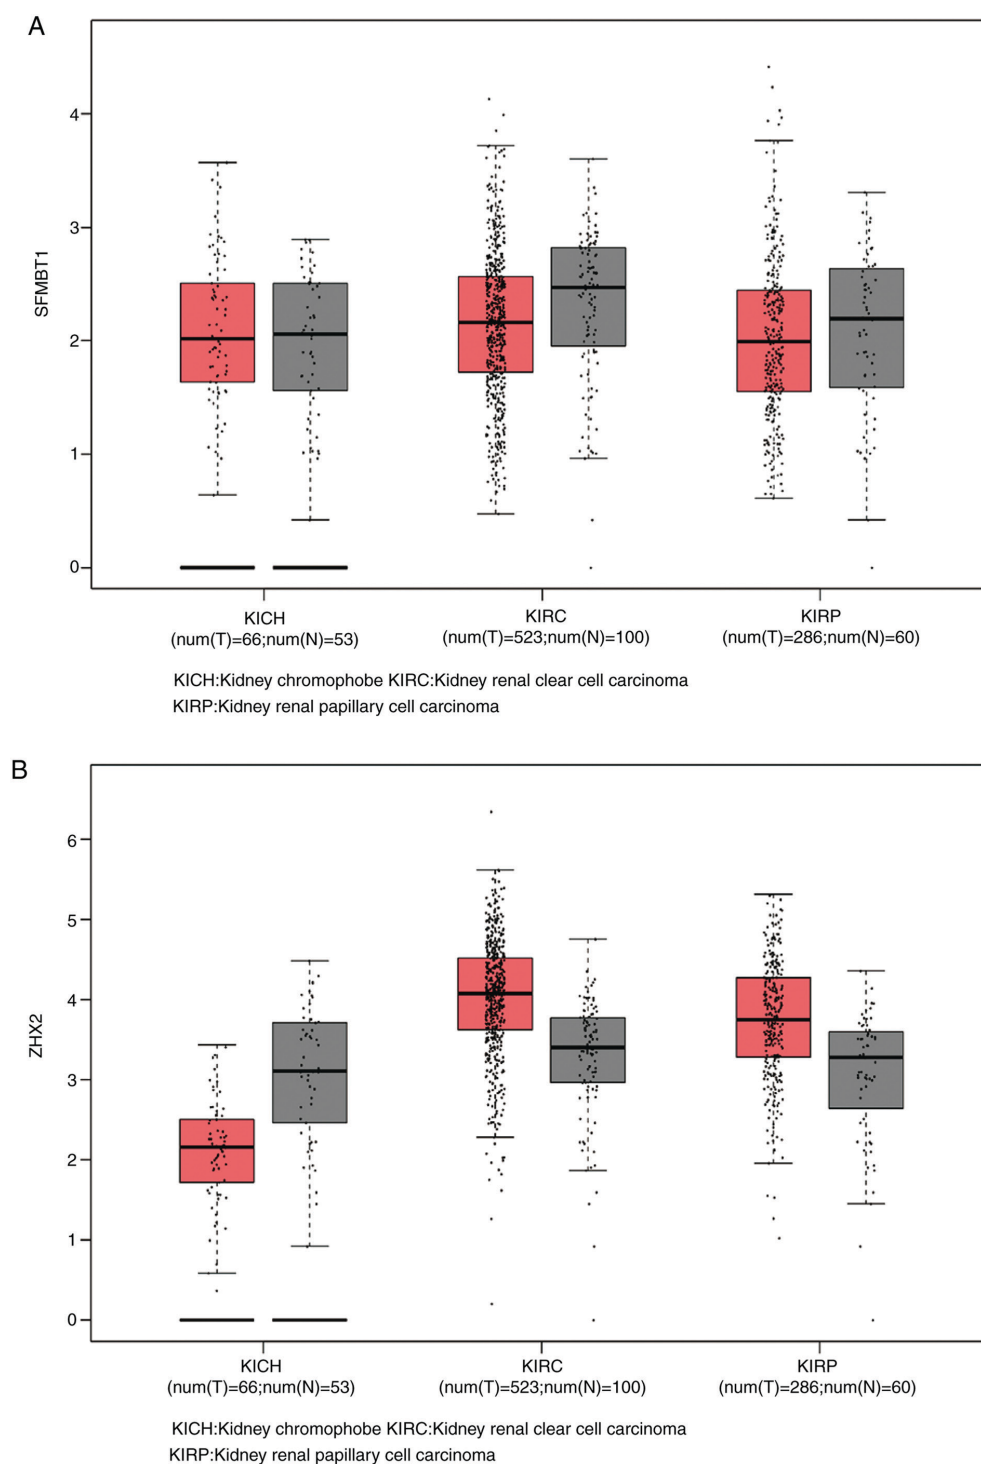

Figure S2. OS and DFS rate according to the database. Kaplan-Meier survival analysis of patients with renal cancer, based on SFMBT1 and ZHX2 expression levels. (A) OS rate and (B) DFS rate curves based on SFMBT1 expression. (C) OS rate and (D) DFS rate curves based on ZHX2 expression. SFMBT1, scm-like with four malignant brain tumor domains; ZHX2, zinc fingers and homeoboxes 2; OS, overall survival; DFS, disease-free survival.

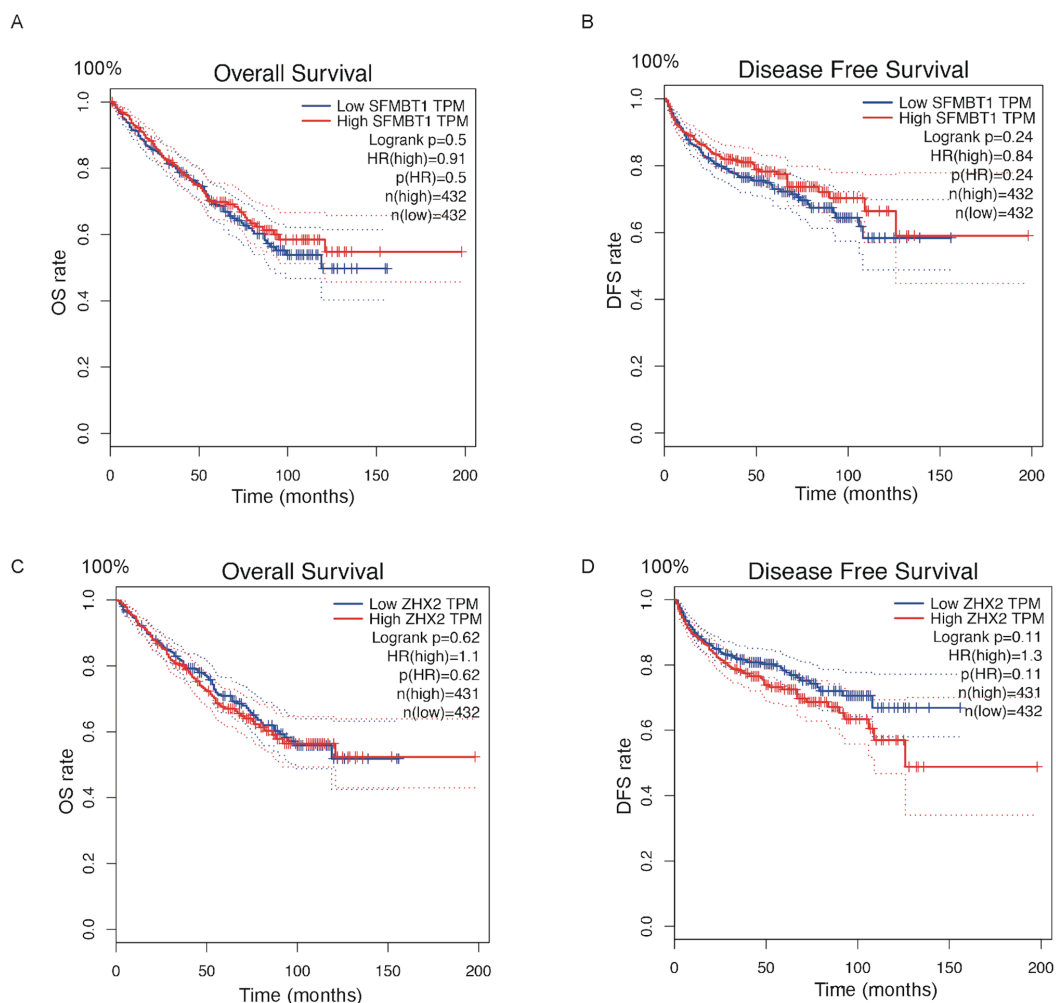

Supplement: Supplementary file 1 [file downloadSupplementary]
